## RESEARCH ARTICLE

# Maternal and perinatal outcomes of hypertensive disorders in pregnancy: Insights from the National Hospital of Obstetrics and Gynecology in Vietnam

Nguyen Thi Huyen Anh<sup>1,2</sup>\*, Nguyen Manh Thang<sup>1,2</sup>, Truong Thanh Huong<sup>1,3</sup>

**1** Hanoi Medical University, Hanoi, Vietnam, **2** National Hospital of Obstetrics and Gynecology, Hanoi, Vietnam, **3** Phenikaa University, Hanoi, Vietnam

\* These authors contributed equally to this work.

\* [nguyenthihuyenanh@hmu.edu.vn](mailto:nguyenthihuyenanh@hmu.edu.vn)

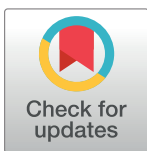

## Abstract

### Introduction

Hypertension is the common disorder encountered during pregnancy, complicating 5% to 10% of all pregnancies. Hypertensive disorders in pregnancy (HDP) are also a leading cause of maternal and perinatal morbidity and mortality. The majority of fetomaternal complications due to HDP have occurred in the low- and middle-income countries. However, few studies have been done to assess the fetomaternal outcomes and the predictors of adverse perinatal outcome among women with HDP in these countries.

### Methods

A prospective cohort study was conducted on women with HDP who were delivered at National Hospital of Obstetrics and Gynecology, Vietnam from March 2023 to July 2023. Socio-demographic and obstetrics characteristics, and fetomaternal outcomes were obtained by trained study staff from interviews and medical records. Statistical analysis was performed using SPSS version 26.0. Bivariate and multiple logistic regressions were done to determine factors associated with adverse perinatal outcome. A 95% confidence interval not including 1 was considered statically significant.

### Results

A total of 255 women with HDP were enrolled. Regarding adverse maternal outcomes, HELLP syndrome (3.9%), placental abruption (1.6%), and eclampsia (1.2%) were three most common complications. There was no maternal death associated with HDP. The most common perinatal complication was preterm delivery developed in 160 (62.7%) of neonates. Eight stillbirths (3.1%) were recorded whereas the perinatal mortality was 6.3%. On bivariate logistic regression, variables such as residence, type of HDP, highest systolic BP, highest diastolic BP, platelet count, severity symptoms, and birth weight were found to be associated with adverse perinatal outcome. On multiple logistic regression, highest diastolic BP,

## OPEN ACCESS

**Citation:** Thi Huyen Anh N, Manh Thang N, Thanh Huong T (2024) Maternal and perinatal outcomes of hypertensive disorders in pregnancy: Insights from the National Hospital of Obstetrics and Gynecology in Vietnam. *PLoS ONE* 19(1): e0297302. <https://doi.org/10.1371/journal.pone.0297302>

**Editor:** Clive J. Petry, University of Cambridge, UNITED KINGDOM

**Received:** September 8, 2023

**Accepted:** January 3, 2024

**Published:** January 31, 2024

**Copyright:** © 2024 Thi Huyen Anh et al. This is an open access article distributed under the terms of the [Creative Commons Attribution License](https://creativecommons.org/licenses/by/4.0/), which permits unrestricted use, distribution, and reproduction in any medium, provided the original author and source are credited.

**Data Availability Statement:** All relevant data are within the paper and its [Supporting Information](#) files.

**Funding:** Fortunately, I have just been funded by the Master, PhD Scholarship Programme of Vingroup Innovation Foundation (code VINIF.2023.TS.004) so I would like to make changes to my financial disclosure. I confirm that the funder had no role in study design, data collection and

analysis, decision to publish, or preparation of the manuscript.

**Competing interests:** The authors have declared that no competing interests exist.

severity symptoms, and birth weight were found to be independent predictors of adverse perinatal outcome.

## Conclusion

Our study showed lower prevalence of stillbirth, perinatal mortality, and maternal complication compared to some previous studies. Regular antenatal care and early detection of abnormal signs during pregnancy help to devise an appropriate monitoring and treatment strategies for each women with HDP.

## Introduction

Hypertension in pregnancy is defined as a systolic pressure  $\geq 140$  mmHg and/or a diastolic pressure  $\geq 90$  mmHg [1]. Hypertension is the common disorder encountered during pregnancy, complicating 5% to 10% of all pregnancies [2]. Hypertensive disorders in pregnancy (HDP) include preeclampsia–eclampsia, chronic hypertension, gestational hypertension, and chronic hypertension with superimposed preeclampsia [1]. Globally, HDP remain the leading causes of maternal and perinatal morbidity and mortality, with an estimated number of 30,000 maternal deaths and 500,000 perinatal deaths each year [3]. HDP are associated with adverse perinatal outcomes like intrauterine growth restriction, prematurity, preterm delivery, perinatal asphyxia, stillbirths and neonatal mortality [4, 5]. HDP also result in an increased risk of adverse maternal outcomes including HELLP syndrome, placental abruption, stroke, renal damage, hepatic injury, pulmonary edema, and death [6, 7]. HELLP is a syndrome characterized by haemolysis, elevated liver enzymes, and low platelets. HELLP syndrome occurs in about 0.5% to 0.9% of all pregnancies and complicates 10% to 20% of women with severe preeclampsia. HELLP syndrome is one of the common cause of maternal and fetal mortality among women with HDP [8].

The majority of feto-maternal complications of HPD have occurred in the low- and middle-income countries due to lack of healthcare service as well as poor quality of maternal and neonatal care [9, 10]. WHO estimated that the incidence of preeclampsia was 7 times higher in low- and middle-income countries than in high-income countries, and the risk of pregnant women in a low-income country dying of pre-eclampsia/eclampsia was 300 times higher than those in a high-income country [11]. However, few studies have been done to assess the feto-maternal outcomes and identify the predictors of adverse perinatal outcome among women with HDP in these countries. To the best of our knowledge, there are few hospital-based reports on HDP in Vietnam and most studies only focus on preeclampsia that is a common type of HDP. In this context, exploring feto-maternal outcomes of HDP will be important to give useful information for healthcare providers and policy makers to design appropriate interventions. Therefore, our study aimed to assess the feto-maternal outcomes and determine factors associated with adverse perinatal outcome among women with HDP in Vietnam.

## Material and methods

### Study design and setting

We conducted a prospective cohort study of women with HDP who were delivered at National Hospital of Obstetrics and Gynecology from March 8<sup>th</sup> 2023 to July 31<sup>st</sup> 2023. National Hospital of Obstetrics and Gynecology is a government referral hospital in Hanoi, the capital of

Vietnam. It has served since 1955. This hospital has 1470 health professionals of which 199 are obstetricians, gynecologists, and neonatologists, and 688 are midwives and nurses. It has a total of 1000 Obstetrics and Gynecology ward beds and 20 delivery coaches.

## Participants

Our study population included all women with HDP who were 18 years or above and were delivered after 28 weeks of gestation at National Hospital of Obstetrics and Gynecology. Excluded from the study were women with HDP who declined to participate in the study and those with other medical disorders like renal, hepatic, cardiovascular, neuronal or endocrine disorders. Women who met the inclusion criteria and consented to the study were enrolled within 24 hours of delivery and followed up to 12 weeks postpartum. This study was part of a prospective cohort study to examine the magnitude of persistent hypertension at 12 weeks postpartum after HDP. Mothers were interviewed within 24 hours of delivery, at 3 days, 7 days, 6 weeks and 12 weeks postpartum by trained study staff.

## Variables and data sources

Data was collected using a structured questionnaire developed by the research authors after reviewing literatures. The data collection involved daily identification of all the women with HDP who were delivered within the previous 24 hours in the hospital. The study protocol was explained to each individual in detail and those who gave written informed consent were included in the study. After receiving written informed consent, the socio-demographic and obstetrics characteristics, and the feto-maternal outcomes were obtained by trained study staff during the participant's hospital stay or within seven days of delivery. Their medical records were also reviewed to determine the maternal and perinatal outcomes of their pregnancies.

In this study, we defined hypertension as two blood pressure (BP) readings with either a systolic BP  $\geq 140$  or a diastolic BP  $\geq 90$  mmHg measured 4 hours apart. Hypertensive disorders in pregnancy were classified as preeclampsia—eclampsia, gestational hypertension, chronic hypertension and preeclampsia superimposed on chronic hypertension. Preeclampsia was characterized by a blood pressure of 140/90 mmHg or greater after 20 weeks' gestation in a woman with previously normal blood pressure and who had proteinuria. In the absence of proteinuria, preeclampsia was diagnosed as hypertension in association with thrombocytopenia, impaired liver function, the new development of renal insufficiency, pulmonary edema, or new-onset cerebral or visual disturbances. Eclampsia was defined as seizures that cannot be attributable to other causes, in a woman with preeclampsia. Gestational hypertension was blood pressure elevation after 20 weeks of gestation in the absence of proteinuria or the aforementioned systemic findings. Chronic hypertension was hypertension that predated pregnancy or diagnosed before 20 weeks of pregnancy, and superimposed preeclampsia was chronic hypertension in association with preeclampsia [1].

Adverse perinatal outcome was defined as a composite of one or more of the following: intrauterine growth restriction, preterm delivery, perinatal asphyxia, stillbirth, and perinatal death. Intrauterine growth restriction was defined as a birth weight of newborn below the tenth percentile of weight distribution at the specified gestational age of a pregnancy. Preterm delivery was a birth of baby occurring after 22 completed weeks but before 37 completed weeks of gestation. Perinatal asphyxia was defined as a neonatal condition defined by five minute APGAR score of less than seven. Stillbirth was death prior to the complete expulsion or extraction from its mother of a product of conception after 28 weeks of pregnancy. Perinatal mortality was stillbirths and newborn deaths within the first seven days of delivery.

## Sample size and power

The sample size was based on the primary cohort study examining persistent hypertension. For this sub-study, sample size and power were therefore not determined a priori.

## Data analysis

The analysis of the data was performed using SPSS version 26.0 software. Descriptive statistics were used to calculate percentages. The results were presented in numbers and percentages. Bivariate and multiple logistic regression were done to determine factors associated with adverse perinatal outcome. Variables which did not show statistical significance in the bivariate analysis were excluded from the multivariate analysis. A statistically significant association was considered when the odds ratio (OR) 95% confidence interval did not include the number 1.

## Ethical consideration

Ethical approval was obtained from Institutional Review Board for Ethics in Biomedical Research–Hanoi Medical University (Approval Number: 820/GCN-HĐĐĐNCYSH-DHYHN). All the study participants gave a written informed consent prior to the commencement of the study.

## Results

### Socio-demographic and obstetrics characteristics of participants

A total of 255 women with HDP were included in the study during the period from March to July 2023. Most of the pregnant women, 231 (90.6%) were urban residents. The average age of mothers was  $31.49 \pm 6.45$  years with a minimum of 18 years and a maximum of 53 years. 108 (42.4%) of the pregnant women were primigravida. More than half of mothers (54.1%) were nulliparous. Most of the pregnant women (89.0%) had no previous history of HDP. Gestational diabetes mellitus accounted for over 17% of the patients. The rate of multiple pregnancy in our study population was 22.4%. Of all the HDP cases, 182 (71.4%) were preeclampsia–eclampsia, 51 (20%) were gestational hypertension, 13 (5.1%) were superimposed preeclampsia, and 9 (3.5%) were chronic hypertension. 35 (13.7%) of women with HDP presented to the hospital with headache as the chief complaint. Rare symptoms that were observed from some of the patients were blurring of vision (3.5%) and epigastric pain (0.4%) (Table 1).

A total of 118 (46.3%) had highest systolic BP of 160 mmHg or more and 41 (16.1%) of them had highest diastolic BP of 110 mmHg or more. Thrombocytopenia (platelet count  $< 100$  G/l) was observed in 6.7% of mothers. Over 57% of the patients had proteinuria  $\geq 2$  g/l. 15 (5.9%) of the pregnant woman developed acute renal failure manifested by the creatinine level of at least 1.1 mg/dl. Impaired liver function manifested by the elevated blood concentrations of liver transaminases to twice normal concentration was seen in more than 7% of mothers. The proportion of preterm delivery was 62.7% whereas low birth weight was 60%. The most common mode of delivery was Caesarean section (92.5%) followed by Spontaneous vaginal delivery (7.1%) and Assisted vaginal delivery (0.4%) (Table 1).

### Feto-maternal outcomes of hypertensive disorders in pregnancy

Regarding adverse maternal outcomes, HELLP syndrome (3.9%), placental abruption (1.6%), and eclampsia (1.2%) were three most common complications. Only 1 (0.4%) of the pregnant women developed pulmonary edema. There was no maternal death reported during the study period. Regarding adverse perinatal outcomes, the study findings showed that the most

**Table 1. Characteristic of women with HDP at National Hospital of Obstetrics and Gynecology, Vietnam, 2023.**

| Variables                     | N   | %    |
|-------------------------------|-----|------|
| Residence                     |     |      |
| Urban                         | 231 | 90.6 |
| Rural                         | 24  | 9.4  |
| Maternal age                  |     |      |
| < 25                          | 47  | 18.4 |
| 25–30                         | 75  | 29.4 |
| > 30                          | 133 | 52.2 |
| Gravidity                     |     |      |
| Primigravida                  | 108 | 42.4 |
| Multigravida                  | 147 | 57.6 |
| Parity                        |     |      |
| Primiparity                   | 138 | 54.1 |
| Multiparity                   | 117 | 45.9 |
| Smoking                       |     |      |
| Yes                           | 80  | 31.4 |
| No                            | 175 | 68.6 |
| Previous history of HDP       |     |      |
| Yes                           | 28  | 11.0 |
| No                            | 227 | 89.0 |
| Gestational diabetes mellitus |     |      |
| Yes                           | 45  | 17.6 |
| No                            | 210 | 82.4 |
| Multiple pregnancy            |     |      |
| Yes                           | 57  | 22.4 |
| No                            | 198 | 77.6 |
| Type of HDP                   |     |      |
| Chronic hypertension          | 9   | 3.5  |
| Gestational hypertension      | 51  | 20.0 |
| Preeclampsia–Eclampsia        | 182 | 71.4 |
| Superimposed preeclampsia     | 13  | 5.1  |
| Severity symptoms             |     |      |
| Headache                      | 35  | 13.7 |
| Epigastric pain               | 1   | 0.4  |
| Blurring of vision            | 9   | 3.5  |
| Highest systolic BP (mmHg)    |     |      |
| < 140                         | 49  | 19.2 |
| 140–159                       | 88  | 34.5 |
| ≥ 160                         | 118 | 46.3 |
| Highest diastolic BP (mmHg)   |     |      |
| < 90                          | 86  | 33.7 |
| 90–109                        | 128 | 50.2 |
| ≥ 110                         | 41  | 16.1 |
| Platelet count (G/l)          |     |      |
| < 100                         | 17  | 6.7  |
| ≥ 100                         | 238 | 93.3 |
| Proteinuria (g/l)             |     |      |
| < 2                           | 147 | 57.6 |

*(Continued)*

**Table 1.** (Continued)

| Variables                       | N   | %    |
|---------------------------------|-----|------|
| ≥ 2                             | 108 | 42.4 |
| AST (UI/l)                      |     |      |
| < 70                            | 237 | 92.9 |
| ≥ 70                            | 18  | 7.1  |
| ALT (UI/l)                      |     |      |
| < 70                            | 236 | 92.5 |
| ≥ 70                            | 19  | 7.5  |
| Creatinine (mg/dl)              |     |      |
| < 1,1                           | 240 | 94.1 |
| ≥ 1,1                           | 15  | 5.9  |
| Gestational age (weeks)         |     |      |
| 28–33                           | 81  | 31.8 |
| 34–36                           | 79  | 31.0 |
| ≥ 37                            | 95  | 37.3 |
| Mode of delivery                |     |      |
| Spontaneous vaginal delivery    | 18  | 7.1  |
| Assisted vaginal delivery       | 1   | 0.4  |
| Cesarean section                | 236 | 92.5 |
| Birth weight (g)                |     |      |
| < 2500                          | 153 | 60.0 |
| ≥ 2500                          | 102 | 40.0 |
| Maternal adverse outcomes       |     |      |
| Elampsia                        | 3   | 1.2  |
| Placental abruption             | 4   | 1.6  |
| Pulmonary edema                 | 1   | 0.4  |
| HELLP syndrome                  | 10  | 3.9  |
| Death                           | 0   | 0    |
| Perinatal adverse outcomes      |     |      |
| Intrauterine growth restriction | 63  | 24.7 |
| Preterm delivery                | 160 | 62.7 |
| Perinatal asphyxia              | 26  | 10.2 |
| Stillbirth                      | 8   | 3.1  |
| Perinatal death                 | 16  | 6.3  |

<https://doi.org/10.1371/journal.pone.0297302.t001>

common perinatal complication was preterm delivery developed in 160 (62.7%) of neonates. The proportion of intrauterine growth restriction was 24.7% among all neonates delivered from hypertensive mothers. APGAR score less than 7 in the 5th minute accounted for 10.2% of neonates. Eight stillbirths (3.1%) were recorded whereas the perinatal mortality was 6.3% (Table 1).

### Factors associated with adverse perinatal outcome

On bivariate logistic regression, variables such as residence, type of HDP, highest systolic BP, highest diastolic BP, platelet count, severity symptoms, and birth weight were found to be associated with adverse perinatal outcome. On multiple logistic regression, the independent predictors of adverse perinatal outcome were highest diastolic BP  $\geq 110$  mmHg (AOR = 4.33, 95%CI = 1.46–12.86), severity symptoms (AOR = 17.53, 95%CI = 1.54–199.88), and birth weight < 2500 g (AOR = 56.68, 95%CI = 20.47–156.88) (Table 2).

**Table 2. Bivariate and multiple logistic regression of adverse perinatal outcome of HDP at National Hospital of Obstetrics and Gynecology, Vietnam, 2023.**

| Variables                   | Adverse perinatal outcome |            | COR (95% CI)         | AOR (95% CI)                |
|-----------------------------|---------------------------|------------|----------------------|-----------------------------|
|                             | No n (%)                  | Yes n (%)  |                      |                             |
| Residence                   |                           |            |                      |                             |
| Urban                       | 78 (33.8)                 | 153 (66.2) | 1                    | 1                           |
| Rural                       | 3 (12.5)                  | 21 (87.5)  | 3.57 (1.03–12.33)    | 5.24 (0.77–35.92)           |
| Type of HDP                 |                           |            |                      |                             |
| CH                          | 5 (55.6)                  | 4 (44.4)   | 1.14 (0.27–4.77)     | 0.29 (0.036–2.29)           |
| GH                          | 30 (58.8)                 | 21 (41.2)  | 1                    | 1                           |
| PE                          | 44 (24.2)                 | 138 (75.8) | 4.48 (2.33–8.61)     | 1.14 (0.43–3.04)            |
| PE/CH                       | 2 (15.4)                  | 11 (84.6)  | 7.86 (1.58–39.17)    | 1.80 (0.12–26.38)           |
| Highest systolic BP (mmHg)  |                           |            |                      |                             |
| < 140                       | 20 (40.8)                 | 29 (59.2)  | 1                    | 1                           |
| 140–159                     | 33 (37.5)                 | 55 (62.5)  | 1.15 (0.56–2.35)     | 1.29 (0.46–3.61)            |
| ≥ 160                       | 28 (23.7)                 | 90 (76.3)  | 2.22 (1.09–4.51)     | 1.76 (0.47–6.69)            |
| Highest diastolic BP (mmHg) |                           |            |                      |                             |
| < 90                        | 43 (50.0)                 | 43 (50.0)  | 1                    | <b>1</b>                    |
| 90–109                      | 32 (25.0)                 | 96 (75.0)  | 3.00 (1.68–5.37)     | <b>3.02 (0.58–15.72)</b>    |
| ≥ 110                       | 6 (14.6)                  | 35 (85.4)  | 5.83 (2.23–15.29)    | <b>4.33 (1.46–12.86)</b>    |
| Platelet count (G/l)        |                           |            |                      |                             |
| < 100                       | 1 (5.9)                   | 16 (94.1)  | 8.10 (1.06–62.19)    | 7.81 (0.44–138.22)          |
| ≥ 100                       | 80 (33.6)                 | 158 (66.4) | 1                    | 1                           |
| Severity symptoms           |                           |            |                      |                             |
| Yes                         | 1 (2.6)                   | 37 (97.4)  | 21.61 (2.91–160.50)  | <b>17.53 (1.54–199.88)</b>  |
| No                          | 80 (36.9)                 | 137 (63.1) | 1                    | <b>1</b>                    |
| Birth weight (g)            |                           |            |                      |                             |
| < 2500                      | 7 (4.6)                   | 146 (95.4) | 55.12 (23.00–132.12) | <b>56.68 (20.47–156.88)</b> |
| ≥ 2500                      | 74 (72.5)                 | 28 (27.5)  | 1                    | <b>1</b>                    |

CH: Chronic hypertension, GH: Gestational hypertension, PE: Preeclampsia–Eclampsia, BP: Blood pressure, COR: Crude Odds Ratio, AOR: Adjusted Odds Ratio, CI: Confidence Interval.

<https://doi.org/10.1371/journal.pone.0297302.t002>

## Discussion

This study aimed to assess the feto-maternal outcomes and determine factors associated with adverse perinatal outcome among women with HDP who gave birth at National Hospital of Obstetrics and Gynecology from March 2023 to July 2023. In our study, the prevalence of low birth weight and preterm birth were 60% and 62.7%, respectively. The present prevalences were higher than some studies in Northwest Tigray–Ethiopia (36.8% vs 36.8%) [12], India (40.3%) [13], Uganda (37.1% vs 55.3%) [14], and Addis Ababa–Ethiopia (44.2% vs 32.8%) [15]. This could be attributed partly to the fact that gestational age at termination of pregnancy in our study was earlier than 4 previous studies. It is, however, important to emphasize that the stillbirth rate and perinatal mortality rate in our study were lower than the reports from Ethiopia [12, 15], India [13], and Uganda [14]. Moreover, the prevalence of adverse maternal outcomes including placental abruption (1.6%), pulmonary edema (0.4%), eclampsia (1.2%), and HELLP syndrome (3.9%) in this study were also lower as compared to 4 previous studies. It is worth mentioning that there was no maternal death associated with HDP at National Hospital of Obstetrics and Gynecology during the study period. These findings indicated that early detection and stringent interventions including termination of the pregnancy in severe HDP

could contribute to reduce stillbirth rate and perinatal mortality rate, as well as prevent maternal complications. Furthermore, a decrease in adverse maternal and perinatal outcome in this study could be due to the fact that our hospital had improved care facilities, well-trained obstetricians and neonatologists, flexible referral system to the hospital from primary health centers, and appropriate management strategy for antenatal, intrapartum, and postnatal care. Our hospital also gave services for 24 hours a day and 7 days a week. WHO study showed that the availability of basic and comprehensive Emergency Obstetric Care 24 hours per day and 7 days per week in conjunction with a functioning referral system play an important role in preventing most maternal deaths with direct causes [16].

The findings of this study showed that those who were referred from the rural resident had more adverse perinatal outcome as compared to those with mothers from urban. It is consistent with a retrospective study done in Ethiopia [17] and a population-based cohort study done in Canada [18]. This might be related to delay in reaching the facility, poor-quality medical equipment, lack of antenatal care and postpartum follow-up, and weak referral linkage in rural areas. In this study, it was found that perinatal complication respectively four and eight times higher in preeclampsia–eclampsia and superimposed preeclampsia than in gestational hypertension. This is in agreement with a study conducted in Addis Ababa [19] and Wolaita Zone [20]. Previous study proved that the prevalence of low birth weight, preterm delivery, and low Apgar at the first minute and 5th minute were statistically significant association with the severity of HDP [19]. Preeclampsia–eclampsia can lead to higher frequency of neonatal respiratory distress, and increased frequency of admission to neonatal intensive care unit [21].

Regarding to characteristics of HDP, the binary logistic regression analysis demonstrated that highest systolic BP, highest diastolic BP, platelet count, and severity symptoms were predictors of adverse perinatal outcome. This finding is similar with two studies done in Ethiopia [12, 22]. An increase in the risk of perinatal complication with an increase in blood pressure was observed in this study. This might be due to that high blood pressure reduces low normal uteroplacental blood flow, which can affect the well-being of fetuses. Significantly increased risk of perinatal complication were also observed among women with severity symptoms (headache, epigastric pain, blurring of vision) and thrombocytopenia ( $< 100$  G/l). This is probably because the presence of severity symptoms and thrombocytopenia indicates that pregnant women were likely to develop more severe forms of HDP such as eclampsia or HELLP syndrome. These severe forms of HDP are usually complicated by placental abruption, disseminated intravascular coagulation, fetal growth restriction, respiratory distress syndrome or neonatal death due to extreme prematurity [23, 24].

On multiple logistic regression, birth weight was found to be the strongest independent predictor of adverse perinatal outcome. The current study showed that mothers with low birth weight at birth had 56.7 times higher risk of adverse perinatal outcome as compared to those with normal birth weight. This finding is in line with a study conducted by WHO [25], and two previous studies done in Ethiopia [22] and Uganda [14]. It might be related to the scientific fact that HDP is associated with intrauterine growth restriction and preterm deliveries [4]. The transition from intrauterine to extrauterine life requires a rapid adaptation of multiple organ systems so the immaturity of fetal system can cause failure to adaptation of extrauterine life [26]. Furthermore, some previous studies indicated that low birth weight was an important determinant of perinatal survival and intensive care admission [27, 28].

The limitation of our study was the short duration as well as the relatively small number of participants involved. In addition, this study was conducted in a single center, which means that the results may not be representative of the general Vietnamese population. However, the findings from the present study will generate a broad idea about the maternal and perinatal health problems of HDP in Vietnam and other Southeast Asia countries with similar settings.



Multicenter longitudinal studies with well-designed methodology and larger sample size are necessary in the future to expand the research scope, and more importantly, to better inform the optimal management and treatment strategies for women with HDP in Vietnam.

## Conclusion

This study showed lower prevalence of stillbirth, perinatal mortality, and maternal complication compared to some previous studies. Such a low prevalence can be expected in a referral hospital where emergency obstetric and essential newborn care are available. The findings of our study also revealed that rural residence, preeclampsia–eclampsia and superimposed preeclampsia, high BP, thrombocytopenia, the presence of severity symptoms, and low birth weight were predictors of adverse perinatal outcome. Therefore, regular antenatal care and early detection of abnormal signs during pregnancy (hypertension, thrombocytopenia, severity symptoms) help to devise an appropriate monitoring and treatment strategies for each women with HDP.

## Supporting information

### S1 Dataset.

(XLSX)

## Acknowledgments

Our sincere gratitude goes to all patients who participated in the study. We are also grateful to all the staff at National Hospital of Obstetrics and Gynecology who contributed to the clinical management of the mothers whose medical information were used in this study.

## Author Contributions

**Conceptualization:** Nguyen Thi Huyen Anh, Nguyen Manh Thang, Truong Thanh Huong.

**Data curation:** Nguyen Thi Huyen Anh, Nguyen Manh Thang.

**Formal analysis:** Nguyen Thi Huyen Anh, Nguyen Manh Thang.

**Funding acquisition:** Nguyen Manh Thang.

**Investigation:** Nguyen Thi Huyen Anh.

**Methodology:** Nguyen Thi Huyen Anh, Nguyen Manh Thang, Truong Thanh Huong.

**Project administration:** Nguyen Thi Huyen Anh, Nguyen Manh Thang, Truong Thanh Huong.

**Resources:** Nguyen Thi Huyen Anh.

**Software:** Nguyen Thi Huyen Anh.

**Supervision:** Nguyen Manh Thang, Truong Thanh Huong.

**Validation:** Nguyen Thi Huyen Anh.

**Visualization:** Nguyen Thi Huyen Anh, Nguyen Manh Thang.

**Writing – original draft:** Nguyen Thi Huyen Anh, Nguyen Manh Thang, Truong Thanh Huong.

**Writing – review & editing:** Nguyen Thi Huyen Anh, Nguyen Manh Thang, Truong Thanh Huong.

## References

1. Hypertension in pregnancy. Report of the American College of Obstetricians and Gynecologists' Task Force on Hypertension in Pregnancy. *Obstet Gynecol.* 2013 Nov; 122(5):1122–31.
2. Folk DM. Hypertensive Disorders of Pregnancy: Overview and Current Recommendations. *J Midwifery Womens Health.* 2018 May; 63(3):289–300. <https://doi.org/10.1111/jmwh.12725> PMID: 29764001
3. von Dadelszen P, Magee LA. Preventing deaths due to the hypertensive disorders of pregnancy. *Best Pract Res Clin Obstet Gynaecol.* 2016 Oct; 36:83–102. <https://doi.org/10.1016/j.bpobgyn.2016.05.005> PMID: 27531686
4. Kassebaum NJ, Bertozzi-Villa A, Coggeshall MS, Shackelford KA, Steiner C, Heuton KR, et al. Global, regional, and national levels and causes of maternal mortality during 1990–2013: a systematic analysis for the Global Burden of Disease Study 2013. *Lancet Lond Engl.* 2014 Sep 13; 384(9947):980–1004. [https://doi.org/10.1016/S0140-6736\(14\)60696-6](https://doi.org/10.1016/S0140-6736(14)60696-6) PMID: 24797575
5. Kumar M, Singh A, Garg R, Goel M, Ravi V. Hypertension during pregnancy and risk of stillbirth: challenges in a developing country. *J Matern-Fetal Neonatal Med Off J Eur Assoc Perinat Med Fed Asia Ocean Perinat Soc Int Soc Perinat Obstet.* 2021 Dec; 34(23):3915–21.
6. Mersha AG, Abegaz TM, Seid MA. Maternal and perinatal outcomes of hypertensive disorders of pregnancy in Ethiopia: systematic review and meta-analysis. *BMC Pregnancy Childbirth.* 2019 Dec 3; 19(1):458. <https://doi.org/10.1186/s12884-019-2617-8> PMID: 31796036
7. Ukah UV, De Silva DA, Payne B, Magee LA, Hutcheon JA, Brown H, et al. Prediction of adverse maternal outcomes from pre-eclampsia and other hypertensive disorders of pregnancy: A systematic review. *Pregnancy Hypertens.* 2018 Jan; 11:115–23. <https://doi.org/10.1016/j.preghy.2017.11.006> PMID: 29198742
8. Steegers EAP, von Dadelszen P, Duvekot JJ, Pijnenborg R. Pre-eclampsia. *Lancet Lond Engl.* 2010 Aug 21; 376(9741):631–44. [https://doi.org/10.1016/S0140-6736\(10\)60279-6](https://doi.org/10.1016/S0140-6736(10)60279-6) PMID: 20598363
9. Bilano VL, Ota E, Ganchimeg T, Mori R, Souza JP. Risk Factors of Pre-Eclampsia/Eclampsia and Its Adverse Outcomes in Low- and Middle-Income Countries: A WHO Secondary Analysis. *PLOS ONE.* 2014 Mar 21; 9(3):e91198. <https://doi.org/10.1371/journal.pone.0091198> PMID: 24657964
10. Firoz T, Sanghvi H, Merialdi M, von Dadelszen P. Pre-eclampsia in low and middle income countries. *Best Pract Res Clin Obstet Gynaecol.* 2011 Aug; 25(4):537–48. <https://doi.org/10.1016/j.bpobgyn.2011.04.002> PMID: 21592865
11. Dolea C, Abouzahr C. Global Burden of Disease 2000 Global burden of hypertensive disorders of pregnancy in the year 2000. *Glob Burd Dis 2000.* 2003 Jan 1;
12. Syoum FH, Abreha GF, Teklemichael DM, Chekole MK. Fetomaternal Outcomes and Associated Factors among Mothers with Hypertensive Disorders of Pregnancy in Suhul Hospital, Northwest Tigray, Ethiopia. *J Pregnancy.* 2022 Nov 9; 2022:6917009. <https://doi.org/10.1155/2022/6917009> PMID: 36406161
13. Panda S, Das R, Sharma N, Das A, Deb P, Singh K. Maternal and Perinatal Outcomes in Hypertensive Disorders of Pregnancy and Factors Influencing It: A Prospective Hospital-Based Study in Northeast India. *Cureus.* 2021 Mar 18; 13(3):e13982. <https://doi.org/10.7759/cureus.13982> PMID: 33880307
14. Lugobe HM, Muhindo R, Kayondo M, Wilkinson I, Agaba DC, McEniery C, et al. Risks of adverse perinatal and maternal outcomes among women with hypertensive disorders of pregnancy in southwestern Uganda. Horey DE, editor. *PLOS ONE.* 2020 Oct 28; 15(10):e0241207. <https://doi.org/10.1371/journal.pone.0241207> PMID: 33112915
15. Wagnaw M, Dessalegn M, Worku A, Nyagero J. Trends of preeclampsia/eclampsia and maternal and neonatal outcomes among women delivering in addis ababa selected government hospitals, Ethiopia: a retrospective cross-sectional study. *Pan Afr Med J.* 2016; 25(Suppl 2):12. <https://doi.org/10.11604/pamj.supp.2016.25.2.9716> PMID: 28439336
16. Knuist M, Bonsel GJ, Zondervan HA, Treffers PE. Intensification of fetal and maternal surveillance in pregnant women with hypertensive disorders. *Int J Gynaecol Obstet Off Organ Int Fed Gynaecol Obstet.* 1998 May; 61(2):127–33. [https://doi.org/10.1016/s0020-7292\(98\)00024-1](https://doi.org/10.1016/s0020-7292(98)00024-1) PMID: 9639216
17. Liyew EF, Yalew AW, Afework MF, Essén B. Maternal near-miss and the risk of adverse perinatal outcomes: a prospective cohort study in selected public hospitals of Addis Ababa, Ethiopia. *BMC Pregnancy Childbirth.* 2018 Aug 22; 18(1):345. <https://doi.org/10.1186/s12884-018-1983-y> PMID: 30134858
18. Lisonkova S, Haslam MD, Dahlgren L, Chen I, Synnes AR, Lim KI. Maternal morbidity and perinatal outcomes among women in rural versus urban areas. *CMAJ Can Med Assoc J J Assoc Medicales Can.* 2016 Dec 6; 188(17–18):E456–65. <https://doi.org/10.1503/cmaj.151382> PMID: 27672220
19. Mengistu MD, Kuma T. Feto-maternal outcomes of hypertensive disorders of pregnancy in Yekatit-12 Teaching Hospital, Addis Ababa: a retrospective study. *BMC Cardiovasc Disord.* 2020 Apr 15; 20(1):173. <https://doi.org/10.1186/s12872-020-01399-z> PMID: 32293281

20. Obsa M, Wolka Woticha E, Girma Weji B, Kassahun Dessu B, Dendir Wolde G, Gebremskel Girmay B, et al. Neonatal and Fetal Outcomes of Pregnant Mothers with Hypertensive Disorder of Pregnancy at Hospitals in Wolaita Zone, Southern Ethiopia. *J Midwifery Reprod Health*. 2019 Apr 1; 7(2):1636–40.
21. Mustafa R, Ahmed S, Gupta A, Venuto RC. A comprehensive review of hypertension in pregnancy. *J Pregnancy*. 2012; 2012:105918. <https://doi.org/10.1155/2012/105918> PMID: 22685661
22. Asseffa NA, Demissie BW. Perinatal outcomes of hypertensive disorders in pregnancy at a referral hospital, Southern Ethiopia. *PLOS ONE*. 2019 Feb 28; 14(2):e0213240. <https://doi.org/10.1371/journal.pone.0213240> PMID: 30817780
23. Fishel Bartal M, Sibai BM. Eclampsia in the 21st century. *Am J Obstet Gynecol*. 2022 Feb; 226(2S): S1237–53. <https://doi.org/10.1016/j.ajog.2020.09.037> PMID: 32980358
24. Gasem T, Al Jama FE, Burshaid S, Rahman J, Al Suleiman SA, Rahman MS. Maternal and fetal outcome of pregnancy complicated by HELLP syndrome. *J Matern-Fetal Neonatal Med Off J Eur Assoc Perinat Med Fed Asia Ocean Perinat Soc Int Soc Perinat Obstet*. 2009 Dec; 22(12):1140–3. <https://doi.org/10.3109/14767050903019627> PMID: 19916711
25. Abalos E, Cuesta C, Carroli G, Qureshi Z, Widmer M, Vogel JP, et al. Pre-eclampsia, eclampsia and adverse maternal and perinatal outcomes: a secondary analysis of the World Health Organization Multi-country Survey on Maternal and Newborn Health. *BJOG Int J Obstet Gynaecol*. 2014 Mar; 121 Suppl 1:14–24.
26. Morton S, Brodsky D. Fetal Physiology and the Transition to Extrauterine Life. *Clin Perinatol*. 2016 Sep; 43(3):395–407. <https://doi.org/10.1016/j.clp.2016.04.001> PMID: 27524443
27. Gebregzabierher Y, Haftu A, Weldemariam S, Gebrehiwet H. The Prevalence and Risk Factors for Low Birth Weight among Term Newborns in Adwa General Hospital, Northern Ethiopia. *Obstet Gynecol Int*. 2017; 2017:2149156. <https://doi.org/10.1155/2017/2149156> PMID: 28744313
28. Endeshaw G, Berhan Y. Perinatal Outcome in Women with Hypertensive Disorders of Pregnancy: A Retrospective Cohort Study. *Int Sch Res Not*. 2015; 2015:208043. <https://doi.org/10.1155/2015/208043> PMID: 27347505
